# Supplementary material for: Ballroom dancers exhibit a dispositional need for arousal and elevated cerebral cortical activity during preferred melodic recall
Source: PeerJ. 2021 Jan 13;9:e10658. doi: 10.7717/peerj.10658 (PMC7811281; doi:10.7717/peerj.10658)
Supplement: Supplemental Information 3 — Each data point indicates the code in raw dataset file and their paraphrase. [file peerj-09-10658-s003.xlsx]

## Sheet: Sheet1
File_Behavior & temperament_raw data
Title	code	paraphrase
Group	1	nondancer
	2	dancer
File_Subset_EEG_raw
Title	code	paraphrase
Group	1	nondancer
	2	dancer
Region	1	frontal
	2	central
	3	parietal
	4	occipital
	5	temporal
Hemisphere	1	left
	2	right
MidLoc	1	Fz
	2	Cz
	3	Pz
	4	Oz
Mgroup	1	nondancer
	2	dancer
